# Supplementary material for: 3-Phosphoinositide-dependent kinase 1 drives acquired resistance to osimertinib
Source: PubMed Central journal article supplement (PMC10175489; doi:10.1038/s42003-023-04889-w), 2023-05-11
Supplement: 42003_2023_4889_MOESM2_ESM.pdf [file 42003_2023_4889_MOESM2_ESM.pdf]

## Description of Additional Supplementary Files

**File name:** Supplementary Data 1

**Description:** the source data behind the graphs in excel
